# Supplementary material for: Photochromic properties of three 2D MOFs based on 1-carboxyethyl-4,4′-bipyridinine
Source: Royal Society of Chemistry journal article supplement (doi:10.1039/c9ra06703e), 2019-01-01
Supplement: c9ra06703e1.pdf [file c9ra06703e1.pdf]

# Photochromic properties of three 2D MOFs based on 1-carboxyethyl-4,4'-bipyridinine

Jinjian Liu\*, Jing Li, Wenbo Lu

Key Laboratory of Magnetic Molecules & Magnetic Information Materials Ministry of Education, The  
School of Chemical and Material Science, Shanxi Normal University, Linfen 041004, China.

**Table S1.** Selected bond lengths (Å) and bond angles (°) for 1–3.

| Compound 1      |            |                 |           |
|-----------------|------------|-----------------|-----------|
| Cd(1)–O(5)      | 2.221(4)   | Cd(1)–N(2)      | 2.304(4)  |
| Cd(1)–O(1)      | 2.352(3)   | Cd(1)–O(4)      | 2.363(4)  |
| Cd(1)–O(7)      | 2.376(5)   | Cd(1)–O(3)      | 2.475(4)  |
| O(5)–Cd(1)–N(2) | 136.42(13) | O(5)–Cd(1)–O(1) | 88.18(13) |
| N(2)–Cd(1)–O(1) | 91.10(13)  | O(5)–Cd(1)–O(4) | 81.32(13) |
| N(2)–Cd(1)–O(4) | 141.88(13) | O(1)–Cd(1)–O(4) | 96.18(16) |
| O(5)–Cd(1)–O(7) | 96.34(16)  | N(2)–Cd(1)–O(7) | 82.64(18) |
| O(1)–Cd(1)–O(7) | 173.74(16) | O(4)–Cd(1)–O(7) | 88.8(2)   |
| O(5)–Cd(1)–O(3) | 133.55(13) | N(2)–Cd(1)–O(3) | 89.62(13) |
| O(1)–Cd(1)–O(3) | 84.53(12)  | O(4)–Cd(1)–O(3) | 54.18(12) |
| O(7)–Cd(1)–O(3) | 95.39(18)  |                 |           |
| Compound 2      |            |                 |           |
| Cd(1)–O(1)      | 2.273(2)   | Cd(1)–O(3)      | 2.348(2)  |
| Cd(1)–O(3)      | 2.414(2)   | Cd(1)–O(4)      | 2.404(2)  |

|                   |            |                 |            |
|-------------------|------------|-----------------|------------|
| Cd(1)–O(5)        | 2.408(3)   | Cd(1)–O(6)      | 2.339(2)   |
| Cd(1)–O(7)        | 2.310(2)   |                 |            |
| O(1)–Cd(1)–O(3)   | 86.66(10)  | O(1)–Cd(1)–O(3) | 94.70(9)   |
| O(1)–Cd(1)–O(4)   | 86.44(10)  | O(1)–Cd(1)–O(5) | 82.85(10)  |
| O(1)–Cd(1)–O(6)   | 103.13(11) | O(1)–Cd(1)–O(7) | 164.67(11) |
| O(3)–Cd(1)–O(3)   | 72.26(9)   | O(3)–Cd(1)–O(4) | 124.47(8)  |
| O(3)–Cd(1)–O(5)   | 100.68(9)  | O(4)–Cd(1)–O(3) | 53.58(8)   |
| O(4)–Cd(1)–O(5)   | 132.78(9)  | O(5)–Cd(1)–O(3) | 172.70(8)  |
| O(6)–Cd(1)–O(3)   | 132.15(9)  | O(6)–Cd(1)–O(3) | 151.43(9)  |
| O(6)–Cd(1)–O(4)   | 83.33(9)   | O(6)–Cd(1)–O(5) | 55.14(10)  |
| O(7)–Cd(1)–O(3)   | 90.21(9)   | O(7)–Cd(1)–O(3) | 81.00(9)   |
| O(7)–Cd(1)–O(4)   | 108.05(11) | O(7)–Cd(1)–O(5) | 90.49(10)  |
| O(7)–Cd(1)–O(6)   | 84.01(10)  |                 |            |
| <b>Compound 3</b> |            |                 |            |
| Zn(1)–O(1)        | 1.954(2)   | Zn(1)–O(4)      | 1.953(2)   |
| Zn(1)–O(5)        | 1.980(2)   | Zn(1)–N(1)      | 2.078(2)   |
| O(1)–Zn(1)–O(5)   | 112.37(11) | O(1)–Zn(1)–N(1) | 100.32(11) |
| O(4)–Zn(1)–O(1)   | 122.39(12) | O(4)–Zn(1)–O(5) | 106.46(11) |
| O(4)–Zn(1)–N(1)   | 117.50(11) | O(5)–Zn(1)–N(1) | 94.45(10)  |

**Table S2.** The hydrogen bond lengths (Å) in **1–3**.

| Compound 1     |       |                |       |
|----------------|-------|----------------|-------|
| C(3)–H···O(1)  | 2.389 | O(8)–H···O(2)  | 2.059 |
| O(9)–H···O(2)  | 1.977 | C(7)–H···O(7)  | 2.705 |
| O(9)–H···O(4)  | 2.195 | C(2)–H···O(4)  | 2.705 |
| C(16)–H···O(5) | 2.468 | C(18)–H···O(6) | 2.602 |
| C(23)–H···O(6) | 2.294 | O(8)–H···O(7)  | 2.682 |
| C(11)–H···O(8) | 2.159 | C(9)–H···O(9)  | 2.548 |
| Compound 2     |       |                |       |
| C(3)–H···O(1)  | 2.555 | C(7)–H···O(2)  | 2.398 |
| O(7)–H···O(2)  | 1.887 | C(16)–H···O(3) | 2.634 |
| O(8)–H···O(4)  | 2.012 | C(16)–H···O(5) | 2.511 |
| O(9)–H···O(6)  | 2.623 | C(9)–H···O(7)  | 2.640 |
| O(8)–H···O(9)  | 1.881 | O(9)–H···O(9)  | 2.023 |
| O(7)–H···O(2)  | 1.887 | O(7)–H···N(2)  | 2.040 |
| Compound 3     |       |                |       |
| C(4)–H···O(2)  | 2.656 | C(10)–H···O(2) | 2.605 |
| C(9)–H···O(6)  | 1.991 | C(11)–H···O(6) | 2.595 |
| C(8)–H···O(7)  | 2.389 | C(2)–H···O(9)  | 2.694 |
| C(4)–H···O(9)  | 2.681 | O(9)–H···O(2)  | 1.871 |

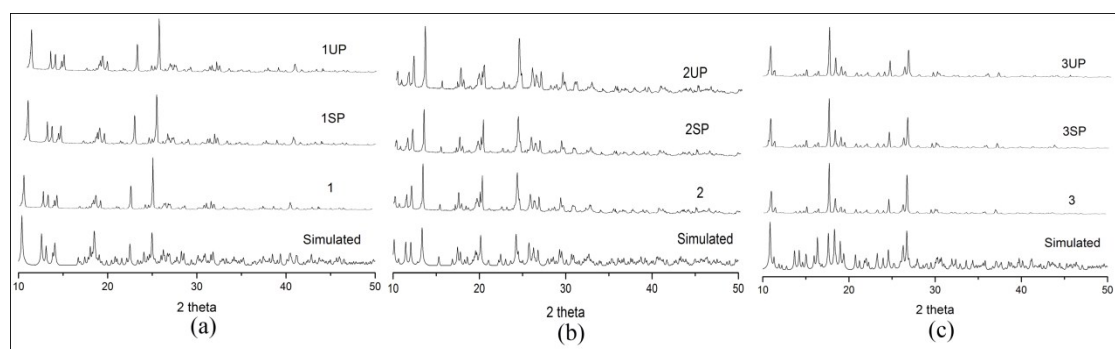

**Fig. S1.** The PXR D spectra before and after irradiation for **1** (a), **2** (b) and **3** (c).

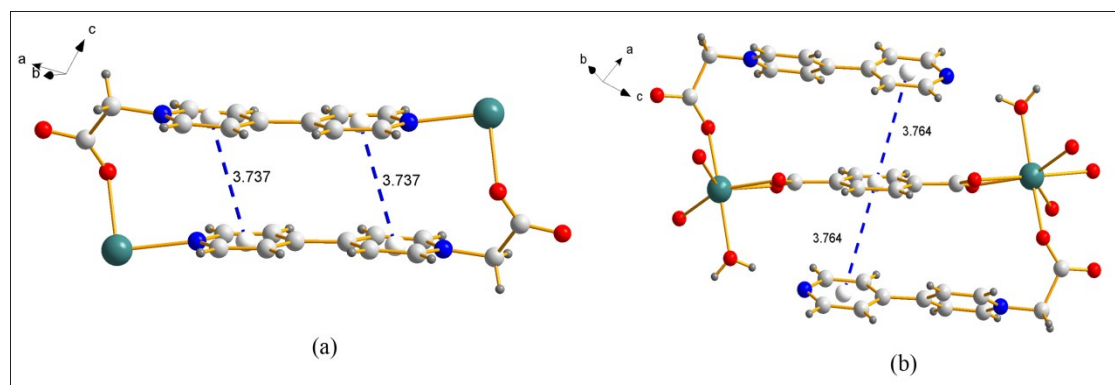

**Fig. S2.**  $\pi \cdots \pi$  stacking interactions for compounds **1** (a) and **2** (b).

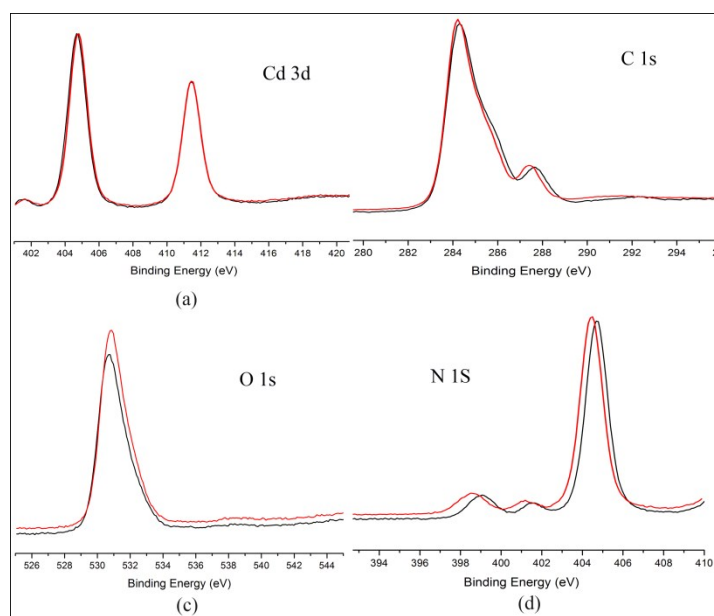

**Fig.S3.** XPS core-level spectra of **1** before (**1**, black line) and after UV-light irradiation (**1UP**, red line).
